# Supplementary material
Source: Springer Nature journal article supplement (https://www.springermedizin.de/resource/supplementary/12936_2008_844_MOESM1_ESM.pdf/9549070)

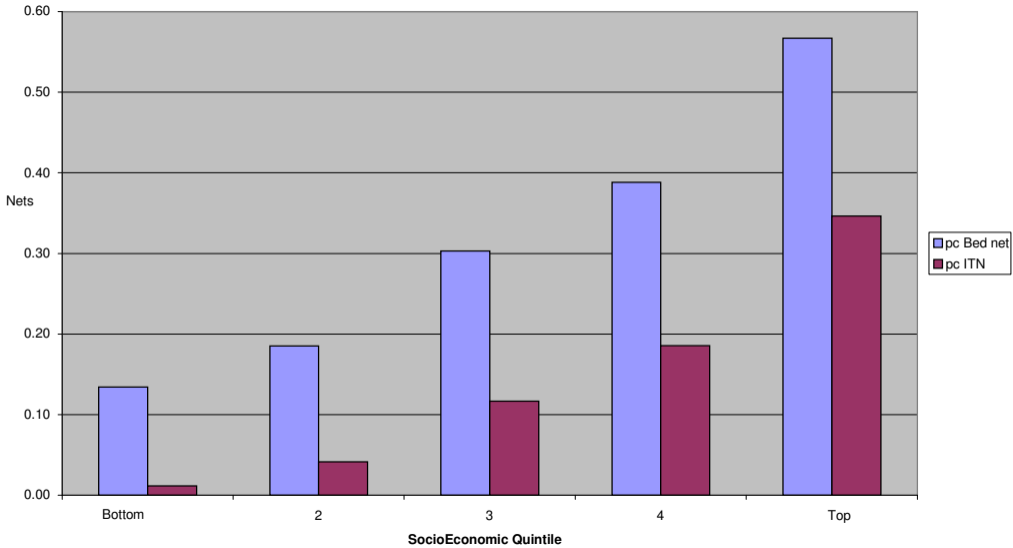

Supplement: MOESM1 [file 9549070]
